# Supplementary material
Source: PubMed Central journal article supplement (PMC11169290)
Supplement: 10278_2024_1015_MOESM1_ESM.pdf [file 10278_2024_1015_MOESM1_ESM.pdf]

## Appendix A: Description of the variables used in our experiment

| Variable Name           | Possible Values                                             | Variable Description*                                            |
|-------------------------|-------------------------------------------------------------|------------------------------------------------------------------|
| Last Status             | Deceased, Discharged                                        | For the selected visit the status of the patient                 |
| Age Splits              | [18,59], (59, 74], (74, 90]                                 | Age intervals (in years) at time of admission                    |
| Gender Concept Name     | FEMALE, MALE                                                | Documented gender in the EHR (Electronic Health Record)          |
| Visit Concept Name      | Inpatient Visit<br>Outpatient Visit<br>Emergency Room Visit | For the selected visit the type of the visit                     |
| Is ICU                  | True, False                                                 | Patient admitted to the ICU based on documented room charges     |
| Was Ventilated          | Yes, No                                                     | The patient had invasive ventilation                             |
| Acute Kidney Injury     | Yes, No                                                     | Had an increase in serum creatinine of 0.3 mg/dL within 48 hours |
| Length of Stay          | Numeric Value (days)                                        | Number of calendar days in the facility                          |
| Oral Temperature        | Numeric Value (°C)                                          |                                                                  |
| Oxygen Saturation       | Numeric Value (%)                                           | Oxygen saturation in Arterial blood by Pulse oximetry            |
| Respiratory Rate        | Numeric Value (/min)                                        |                                                                  |
| Heart Rate              | Numeric Value (/min)                                        |                                                                  |
| Systolic Blood Pressure | Numeric Value (mmHg)                                        |                                                                  |

\* The descriptions are extracted from:

<https://wiki.cancerimagingarchive.net/pages/viewpage.action?pageId=89096912>

## Appendix B. Training of encoder/decoder models on RSNA dataset

### 1. Principal component analysis (PCA)

PCA is a statistical technique that uses orthogonal transformation to convert a set of observations of possibly correlated variables into a set of values of linearly uncorrelated variables called principal components. This method is widely used for dimensionality reduction of data. We utilized the “**sklearn.decomposition.PCA**” module from the scikit-learn library (<https://scikit-learn.org/stable/modules/generated/sklearn.decomposition.PCA.html>). The parameter **n\_components** was set to 128.

## 2. Autoencoder (AE)

An AE is a neural network used for the unsupervised learning of efficient coding. The aim of an AE is to learn the representation (encoding) of a set of data, typically for dimensionality reduction [S1]. We have specified 128 dimensions for the latent code as follows:

| Encoder                  |            |                            | Decoder                  |            |                            |
|--------------------------|------------|----------------------------|--------------------------|------------|----------------------------|
| Layer                    | Activation | Output Shape               | Layer                    | Activation | Output Shape               |
| (Input Image)            |            | $256 \times 256 \times 1$  | (Latent vector)          |            | 128                        |
| Convolution $1 \times 1$ | LReLU      | $256 \times 256 \times 8$  | Linear                   | LReLU      | $4 \times 4 \times 512$    |
| Convolution $3 \times 3$ | LReLU      | $256 \times 256 \times 16$ | Upsampling               |            | $8 \times 8 \times 512$    |
| Downsampling             |            | $128 \times 128 \times 16$ | Convolution $3 \times 3$ | LReLU      | $8 \times 8 \times 256$    |
| Convolution $3 \times 3$ | LReLU      | $128 \times 128 \times 32$ | Upsampling               |            | $16 \times 16 \times 256$  |
| Downsampling             |            | $64 \times 64 \times 32$   | Convolution $3 \times 3$ | LReLU      | $16 \times 16 \times 128$  |
| Convolution $3 \times 3$ | LReLU      | $64 \times 64 \times 64$   | Upsampling               |            | $32 \times 32 \times 128$  |
| Downsampling             |            | $32 \times 32 \times 64$   | Convolution $3 \times 3$ | LReLU      | $32 \times 32 \times 64$   |
| Convolution $3 \times 3$ | LReLU      | $32 \times 32 \times 128$  | Upsampling               |            | $64 \times 64 \times 64$   |
| Downsampling             |            | $16 \times 16 \times 128$  | Convolution $3 \times 3$ | LReLU      | $64 \times 64 \times 32$   |
| Convolution $3 \times 3$ | LReLU      | $16 \times 16 \times 256$  | Upsampling               |            | $128 \times 128 \times 32$ |
| Downsampling             |            | $8 \times 8 \times 256$    | Convolution $3 \times 3$ | LReLU      | $128 \times 128 \times 16$ |
| Convolution $3 \times 3$ | LReLU      | $8 \times 8 \times 512$    | Upsampling               |            | $256 \times 256 \times 16$ |
| Downsampling             |            | $4 \times 4 \times 512$    | Convolution $3 \times 3$ | LReLU      | $256 \times 256 \times 8$  |
| Linear                   |            | 128                        | Convolution $1 \times 1$ | Tanh       | $256 \times 256 \times 1$  |

## 3. Auto-encoding generative adversarial networks ( $\alpha$ GAN)

An  $\alpha$ GAN merges AE with GAN, aiming to improve upon the AE's capability by producing sharper and more realistic images through adversarial training [S2, S3]. We have specified 128 dimensions for the latent code as follows. The generator and encoder of the Auto-encoding GAN are identical to those of the decoder and encoder described in the AE, respectively.

| Generator                                       |            |                            | Encoder                                         |            |              |
|-------------------------------------------------|------------|----------------------------|-------------------------------------------------|------------|--------------|
| Layer                                           | Activation | Output Shape               | Layer                                           | Activation | Output Shape |
| (Same with decoder of the auto-encoder we used) |            |                            | (Same with encoder of the auto-encoder we used) |            |              |
| Discriminator                                   |            |                            | Code Discriminator                              |            |              |
| Layer                                           | Activation | Output Shape               | Layer                                           | Activation | Output Shape |
| (Input Image)                                   |            | $256 \times 256 \times 1$  | (Latent vector)                                 |            | 128          |
| Convolution $1 \times 1$                        | LReLU      | $256 \times 256 \times 8$  | Linear                                          | LReLU      | 1500         |
| Convolution $3 \times 3$                        | LReLU      | $256 \times 256 \times 16$ | Linear                                          |            | 1            |
| Downsampling                                    |            | $128 \times 128 \times 16$ |                                                 |            |              |
| Convolution $3 \times 3$                        | LReLU      | $128 \times 128 \times 32$ |                                                 |            |              |
| Downsampling                                    |            | $64 \times 64 \times 32$   |                                                 |            |              |
| Convolution $3 \times 3$                        | LReLU      | $64 \times 64 \times 64$   |                                                 |            |              |
| Downsampling                                    |            | $32 \times 32 \times 64$   |                                                 |            |              |
| Convolution $3 \times 3$                        | LReLU      | $32 \times 32 \times 128$  |                                                 |            |              |
| Downsampling                                    |            | $16 \times 16 \times 128$  |                                                 |            |              |
| Convolution $3 \times 3$                        | LReLU      | $16 \times 16 \times 256$  |                                                 |            |              |
| Downsampling                                    |            | $8 \times 8 \times 256$    |                                                 |            |              |
| Convolution $3 \times 3$                        | LReLU      | $8 \times 8 \times 512$    |                                                 |            |              |
| Downsampling                                    |            | $4 \times 4 \times 512$    |                                                 |            |              |
| Linear                                          |            | 1                          |                                                 |            |              |

#### 4. Outline of the $\alpha$ GAN model

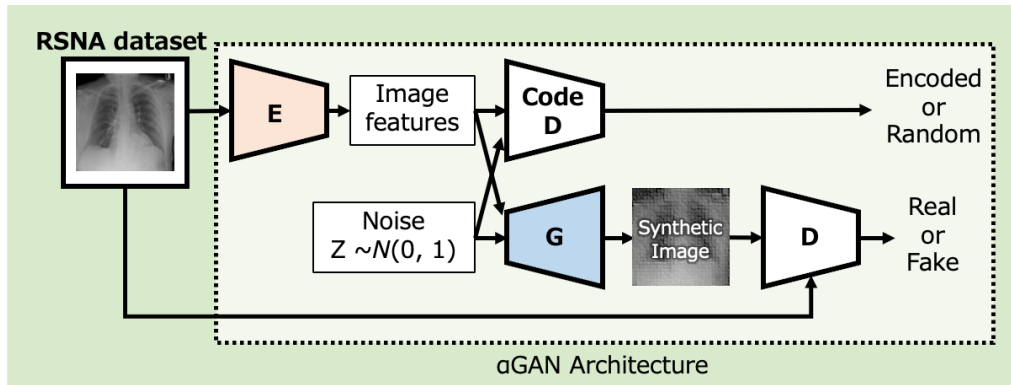

This Figure outlines the architecture of the  $\alpha$ GAN system, which includes four key components. The encoder (E) processes real images from the RSNA dataset, encoding them into latent representations. The generator (G), which uses either latent codes or Gaussian noise, synthesizes images that mimic real images. The discriminator (D) then assesses these images, distinguishing between the genuine images from the dataset and the fabricated images created by G. Finally, the code discriminator (Code D) distinguishes between the actual Gaussian distribution and the latent codes produced by the encoder.

#### Appendix C. Encoders for metric learning

We used the Torchxrayvision library (available at <https://github.com/mlmed/torchxrayvision>) to encode the images [S4]. Within this library, there is a model pretrained on a large dataset using densenet121 [S5] as a base, designed to classify 18 outcomes (Atelectasis, Cardiomegaly, Consolidation, Edema, Effusion, Emphysema, Enlarged Cardio-mediastinum, Fibrosis, Fracture, Hernia, Infiltration, Lung Lesion, Lung Opacity, Mass, Nodule, Pleural Thickening, Pneumonia, Pneumothorax). We reset the weights of the final fully connected layer of the pre-trained model before utilization. The images were resized to  $224 \times 224$  pixels before input. To encode the tabular data, after converting the categorical variables into dummy variables, we employed a simple two-layer, fully connected network as follows:

| Encoder for tabular data  |            |              |
|---------------------------|------------|--------------|
| Layer                     | Activation | Output Shape |
| (Number of table columns) |            | 16           |
| Linear                    | LReLU      | 32           |
| Linear                    |            | 18           |

For contrastive learning training, we used a loss function based on cosine similarity.

## Appendix D: Structure of the prediction model for *Last Status*

We combined the images and tabular data using the following structure. As in Appendix C, we reset the weights of the final fully connected layer of the densenet121 model from TorchXrayvision.

| Image Encoder                               |            |                           | Table Encoder             |            |              |
|---------------------------------------------|------------|---------------------------|---------------------------|------------|--------------|
| Layer                                       | Activation | Output Shape              | Layer                     | Activation | Output Shape |
| (Input image)                               |            | $224 \times 224 \times 1$ | (Number of table columns) |            | 15           |
| Pretrained densenet121 from torchxrayvision |            |                           | Linear                    | LReLU      | 32           |
| (Output dims)                               |            | 18                        | Linear                    |            | 18           |
| Classifier                                  |            |                           |                           |            |              |
| Layer                                       | Activation | Output Shape              |                           |            |              |
| Concatenate                                 |            | 36                        |                           |            |              |
| Linear                                      |            | 1                         |                           |            |              |

## Appendix E: Classification and regression performance

The first column served as the dependent variable, and models were trained using all the table data and images as independent variables, excluding the dependent variable itself and “Last Status.” The model was evaluated on the test set of pDS. “Last Status” was excluded because it represents outcome information, indicative of future states. Comparisons were made using pDS : sDS = 1 : 0 as the reference and P values were adjusted using the Holm method. The type of test varied depending on the metric: McNemar's test for accuracy (ACC), DeLong's test for area under the curve (AUC), and Wilcoxon signed-rank test for mean absolute error (MAE). P-values less than 0.05 were considered statistically significant.

Ratio between pDS and sDS (pDS : sDS)

| Dependent Variables            | Metrics | Ratio between pDS and sDS (pDS : sDS) |             |             |             |       | pDS + sDS   |
|--------------------------------|---------|---------------------------------------|-------------|-------------|-------------|-------|-------------|
|                                |         | 0 : 1                                 | 0.25 : 0.75 | 0.5 : 0.5   | 0.75 : 0.25 | 1 : 0 |             |
| Age Splits                     | ACC     | <b>0.52</b>                           | 0.59        | <b>0.59</b> | 0.62        | 0.66  | 0.66        |
| Gender Concept Name*           | AUC     | <b>0.75</b>                           | <b>0.76</b> | 0.86        | 0.91        | 0.90  | <b>0.96</b> |
| Visit Concept Name**           | AUC     | <b>0.77</b>                           | 0.95        | 0.94        | 0.95        | 0.95  | 0.94        |
| Is ICU                         | AUC     | 0.86                                  | 0.90        | 0.89        | 0.90        | 0.90  | 0.88        |
| Was Ventilated                 | AUC     | 0.92                                  | 0.91        | 0.95        | 0.93        | 0.94  | 0.96        |
| Acute Kidney Injury            | AUC     | 0.76                                  | 0.73        | 0.77        | 0.78        | 0.78  | 0.78        |
| Length of Stay (days)          | MAE     | <b>6.29</b>                           | 5.17        | <b>5.60</b> | 5.19        | 5.12  | 5.10        |
| Oral Temperature (%)           | MAE     | 1.38                                  | 1.52        | 1.32        | 1.41        | 1.39  | <b>1.30</b> |
| Oxygen Saturation (%)          | MAE     | <b>4.53</b>                           | 4.16        | 4.11        | 4.11        | 3.90  | 4.02        |
| Respiratory Rate (/min)        | MAE     | 3.90                                  | 3.88        | <b>4.44</b> | 3.92        | 3.83  | 3.93        |
| Heart Rate (/min)              | MAE     | <b>17.01</b>                          | 15.89       | 15.16       | 16.15       | 15.37 | 15.39       |
| Systolic Blood Pressure (mmHg) | MAE     | <b>18.80</b>                          | 17.94       | 17.98       | 17.62       | 17.86 | 17.23       |

ACC: Accuracy, AUC: area under the receiver operating characteristic curve, MAE: mean absolute error

Cells highlighted in color indicate statistically significant performance changes compared to that with pDS : sDS = 1 : 0, with orange denoting improvement and blue indicating a decrease in performance.

\* Gender Concept Name: Binary classification (MALE/FEMALE).

\*\* Visit Concept Name: Treated as binary because there are no cases with the “Outpatient Visit” category in the pDS test set.

- S1. Bank D, Koenigstein N, Giryas R: Autoencoders. *Machine Learning for Data Science Handbook: Data Mining and Knowledge Discovery Handbook*. Springer International Publishing, Cham, pp 353–374, 2023
- S2. Rosca M, Lakshminarayanan B, Warde-Farley D, Mohamed S: Variational approaches for auto-encoding generative adversarial networks. *arXiv [stat.ML]*, 2017
- S3. Nakao T, Hanaoka S, Nomura Y, Murata M, Takenaga T, Miki S, Watadani T, Yoshikawa T, Hayashi N, Abe O: Unsupervised deep anomaly detection in chest radiographs. *J Digit Imaging* 34:418–427, 2021
- S4. Cohen JP, Viviano JD, Bertin P, et al (06–08 Jul 2022) TorchXRyVision: A library of chest X-ray datasets and models. In: Konukoglu E, Menze B, Venkataraman A, Baumgartner C, Dou Q, Albarqouni S (eds) *Proceedings of The 5th International Conference on Medical Imaging with Deep Learning*. PMLR, pp 231–249
- S5. Chen Y, Kang X, Shi YQ, Wang ZJ: A multi-purpose image forensic method using densely connected convolutional neural networks. *J Real Time Image Process* 16:725–740, 2019
